# Supplementary material
Source: publisher figshare collection journal article supplement (https://diabetesjournals.figshare.com/ndownloader/files/25476566)
Supplement: Supplementary file 1 [file 25476566]

## Online-Only Supplemental Material

### Supplemental Figure S1. Flow diagram of study participants and VCTE study

subgroups.

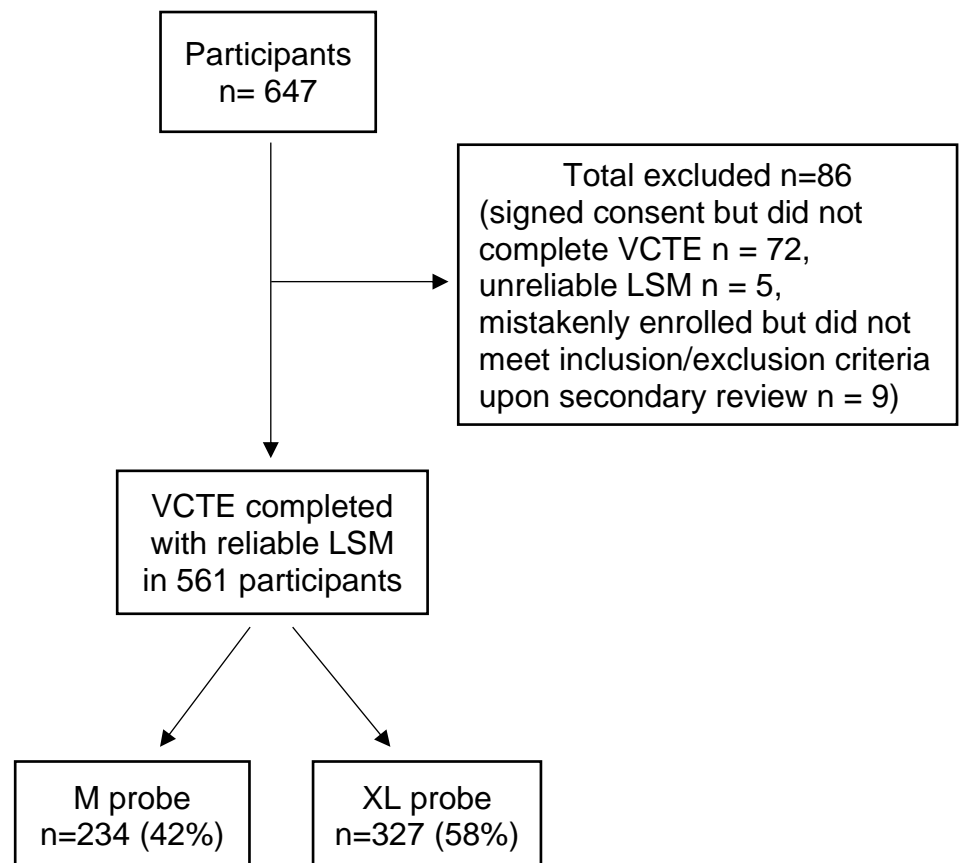

**Supplemental Table 2.** Patient characteristics of patients with liver fibrosis on vibration controlled transient elastography that underwent a liver biopsy versus those that did not.

| Clinical parameters                               | Patients with kPa $\geq 8.2$ with biopsy (n= 21) | Patients with kPa $\geq 8.2$ and no biopsy (n= 63) | P values |
|---------------------------------------------------|--------------------------------------------------|----------------------------------------------------|----------|
| Age (years)                                       | 56 $\pm$ 12                                      | 59 $\pm$ 12                                        | 0.39     |
| Gender (M/F%)                                     | 50/50                                            | 57/43                                              | 0.68     |
| BMI (kg/m <sup>2</sup> )                          | 37.1 $\pm$ 6.7                                   | 38.0 $\pm$ 6.1                                     | 0.65     |
| Overweight                                        | 22%                                              | 9%                                                 | 0.04     |
| Obese                                             | 78%                                              | 91%                                                | 0.04     |
| Ethnicity:                                        | 88%                                              | 78%                                                | 0.09     |
| Caucasian                                         | 0%                                               | 17%                                                |          |
| African-American                                  | 11%                                              | 0%                                                 |          |
| Hispanics                                         | 0%                                               | 0%                                                 |          |
| Asian                                             | 0%                                               | 4%                                                 |          |
| Other/not reported                                |                                                  |                                                    |          |
| HbA1c (%)                                         | 7.5 $\pm$ 1.5                                    | 7.3 $\pm$ 1.6                                      | 0.63     |
| Fasting plasma glucose (mg/dL)                    | 155 $\pm$ 70                                     | 123 $\pm$ 11                                       | 0.046    |
| Systolic blood pressure (mmHg)                    | 138 $\pm$ 21                                     | 138 $\pm$ 16                                       | 0.96     |
| Diastolic blood pressure (mmHg)                   | 80 $\pm$ 11                                      | 81 $\pm$ 12                                        | 0.86     |
| Total cholesterol (mg/dL)                         | 172 $\pm$ 70                                     | 161 $\pm$ 31                                       | 0.52     |
| Triglycerides (mg/dL)                             | 255 $\pm$ 146                                    | 156 $\pm$ 50                                       | <0.01    |
| LDL-cholesterol (mg/dL)                           | 74 $\pm$ 54                                      | 89 $\pm$ 27                                        | 0.29     |
| HDL-cholesterol (mg/dL)                           | 41 $\pm$ 11                                      | 42 $\pm$ 11                                        | 0.77     |
| Aspartate aminotransferase, AST (U/L)             | 34 $\pm$ 4                                       | 27 $\pm$ 4                                         | 0.27     |
| Alanine aminotransferase, ALT (U/L)               | 44 $\pm$ 8                                       | 33 $\pm$ 8                                         | 0.28     |
| Mean controlled attenuation parameter, CAP (dB/m) | 351 $\pm$ 38                                     | 345 $\pm$ 47                                       | 0.66     |
| Mean liver stiffness (kPa)                        | 10.3 $\pm$ 2.2                                   | 13.4 $\pm$ 6.4                                     | 0.06     |
